# Supplementary material for: Distinct Dominant Lineage from In Vitro Expanded Adipose-Derived Stem Cells (ASCs) Exhibits Enhanced Wound Healing Properties
Source: MDPI journal article supplement (doi:10.3390/cells11071236), 2022-04-06
Supplement: s1 [file s1]

**Table S1.** List of primary antibodies

| Fluorophore      | Antigen | Host  | Company                 | Catalog No. |
|------------------|---------|-------|-------------------------|-------------|
| BUV395           | CD201   | rat   | BD Biosciences          | 743557      |
| PE-CF594         | CD105   | mouse | BD Biosciences          | 562380      |
| Alexa Fluor® 647 | CD166   | mouse | BD Biosciences          | 564938      |
| PE-CF594         | CD274   | mouse | BD Biosciences          | 563742      |
| FITC             | CD73    | mouse | BD Biosciences          | 561254      |
| BUV395           | CD36    | mouse | BD Biosciences          | 565422      |
| BB515            | CD200   | mouse | BD Biosciences          | 564784      |
| BB700            | CD271   | mouse | BD Biosciences          | 746140      |
| BUV737           | CD248   | mouse | BD Biosciences          | 748753      |
| APC              | Stro-1  | mouse | ThermoFisher Scientific | MA5-28635   |
| Percp-Cy5.5      | CD90    | mouse | BD Biosciences          | 561557      |
| PE-Cy7           | CD146   | mouse | BD Biosciences          | 562135      |
| BUV496           | CD34    | mouse | BD Biosciences          | 749903      |

**Table S2.** Primer information

| Target      |   | Primer Sequence                           | Annealing temp (°C) |
|-------------|---|-------------------------------------------|---------------------|
| PPARG2      | F | 5'- TCA GGT TTG GGC GGA TGC -3'           | 60                  |
|             | R | 5'- TCA GCG GGA AGG ACT TTA TGT ATG -3'   |                     |
| Osteocalcin | F | 5'- GAG CCC CAG TCC CCT ACC C -3'         | 65                  |
|             | R | 5'- GCC TCC TGA AAG CCG ATG TG-3'         |                     |
| SOX9        | F | 5'- TTC GGT TAT TTT TAG GAT CAT CTC G -3' | 60                  |
|             | R | 5'- CAC ACA GCT CAC TCG ACG ACC TTG -3'   |                     |
| PPIA        | F | 5'- TCC TGG CAT CTT GTC CAT G -3'         | 60                  |
|             | R | 5'- CCA TCC AAC CAC TCA GTC TTG -3'       |                     |
| YWHAZ       | F | 5'- ACT TTT GGT ACA TTG TGG CTT CAA -3'   | 60                  |
|             | R | 5'- CCG CCA GGA CAA ACC AGT AT -3'        |                     |

F, forward primer; R, reverse primer
